1 **The non-steroidal anti-inflammatory drug nimesulide kills Gyps**  
2 **vultures at concentrations found in the muscle of treated cattle.**

3  
4 Galligan, Toby. H.<sup>a,1</sup>, Green, Rhys. E.<sup>b</sup>, Wolter, Kerri.<sup>c</sup>, Taggart, Mark. A.<sup>d</sup>, Duncan, Neil.<sup>e</sup>,  
5 Mallord, John. W.<sup>a\*</sup>, Alderson, Dawn.<sup>f</sup>, Li, Yuan.<sup>d</sup>, Naidoo, Vinny.<sup>g</sup>

6  
7 <sup>a</sup> RSPB Centre for Conservation Science, RSPB, The Lodge, Sandy, Bedfordshire, SG19 2DL  
8 UK

9 <sup>b</sup> Conservation Science Group, Department of Zoology, University of Cambridge, David  
10 Attenborough Building, Cambridge, Cambridgeshire, CB2 3QZ, UK

11 <sup>c</sup> VulPro, Rietfontein, North West Province, 0048, SA

12 <sup>d</sup> Environmental Research Institute, University of the Highlands and Islands, Thurso, Caithness,  
13 KW17 7JD, UK

14 <sup>e</sup> Department of Paraclinical Sciences, Faculty of Veterinary Science, University of Pretoria,  
15 Onderstepoort, Gauteng, 0110, SA

16 <sup>f</sup> SAC Consulting Veterinary Services, SRUC, Janetstown, Caithness, KW14 7XF, UK

17 <sup>g</sup> Department of Paraclinical Sciences, Faculty of Veterinary Science, University of Pretoria,  
18 Onderstepoort, Gauteng, 0110, SA

19 <sup>1</sup> Current address: 6 Itawara Place, Bridgewater, South Australia, Australia, 5155.

20  
21 \*Corresponding author: [john.mallord@rspb.org.uk](mailto:john.mallord@rspb.org.uk)

22

23

24

25

26 **Abstract**

27

28 Throughout South Asia, cattle are regularly treated with non-steroidal anti-inflammatory drugs  
29 (NSAIDs) and their carcasses are left for scavengers to consume. Residues of the NSAID  
30 diclofenac in cattle carcasses caused widespread mortality and catastrophic population declines  
31 in three species of *Gyps* vulture during the 1990s and 2000s. Diclofenac is now banned, but  
32 other NSAIDs are used in its place. Different lines of evidence, including safety testing in *Gyps*  
33 vultures, have shown that some of these other NSAIDs are toxic, or probably toxic, to vultures.  
34 The NSAID nimesulide is widely available and commonly used, and has been found in dead  
35 vultures with signs of renal failure (i.e. visceral gout) and without the presence of diclofenac  
36 and/or other vulture-toxic NSAIDs. Nimesulide is therefore probably toxic to vultures. Here, we  
37 report safety testing of nimesulide in *Gyps* vultures. In a controlled toxicity experiment, we gave  
38 two vultures the maximum likely exposure of nimesulide calculated from initial pharmacokinetic  
39 and residue experiments in cattle. Two other control birds were given an oral dose of water.  
40 Both vultures dosed with nimesulide died within 30 h, after showing outward signs of toxicity and  
41 increases in biochemical indicators of renal failure. Post-mortem examinations found extensive  
42 visceral gout in both vultures. Both control vultures survived without biochemical indicators of  
43 renal failure. With this evidence, we call for an immediate and comprehensive ban of nimesulide  
44 throughout South Asia to ensure the survival of the region's Critically Endangered vultures.  
45 More generally, testing the impacts of drugs on non-target species should be the responsibility  
46 of the pharmaceutical industry, before their veterinary use is licensed.

47

48 **Keywords:** safety testing; ecotoxicology; NSAID; Asian vulture crisis; pharmaceuticals in the  
49 environment

50

51

## 52 1. Introduction

53

54 Pharmaceuticals in the environment can impact wildlife populations in a variety of lethal and  
55 sublethal ways (Arnold *et al.* 2014; Bean and Rattner 2018; Saaristo *et al.* 2018; Ulrika and  
56 Wong 2019). A catastrophic example of pharmaceutical pollution causing death and declines in  
57 wildlife populations is that of diclofenac and its impact on *Gyps* vultures in South Asia (Pain *et*  
58 *al.* 2008). *Gyps* vultures are highly sensitive to the non-steroidal anti-inflammatory drug  
59 (NSAID) diclofenac (Oaks *et al.* 2004; Shultz *et al.* 2004; Swan *et al.* 2006a). The widespread  
60 and frequent use of diclofenac to treat livestock, combined with the traditional practice of leaving  
61 cattle carcasses for vultures to consume in South Asia, caused catastrophic declines in three  
62 *Gyps* species (i.e., white-rumped vulture *G. bengalensis*, long-billed vulture *G. indicus* and  
63 slender-billed vulture *G. tenuirostris*; Prakash *et al.* 2007; Green *et al.* 2004, 2007). Hardest hit  
64 was the white-rumped vulture population in India, formerly one of the most abundant bird  
65 populations in the world, which declined by 99.9% between 1992 and 2007, a loss of an  
66 estimated 40 million birds (Prakash *et al.* 2007). Evidence suggests that other species of  
67 vultures and scavenging birds of prey are also intolerant to diclofenac and have suffered similar  
68 declines (Cuthbert *et al.* 2006; Acharya *et al.* 2009, 2010; Sharma *et al.* 2014). Five species of  
69 vultures, resident to South Asia, were uplisted to Critically Endangered or Endangered as a  
70 result of declines known or suspected to be caused by diclofenac (Birdlife 2017). Veterinary  
71 diclofenac is now banned throughout South Asia and declines in most vulture populations have  
72 slowed and in some have been reversed (Chaudhary *et al.* 2012; Galligan *et al.* 2014, 2019;  
73 Paudel *et al.* 2015; Prakash *et al.* 2017). However, the illegal use of human formulations of  
74 diclofenac in veterinary care is still occurring, especially in India, albeit at lower levels than  
75 before the bans (Galligan *et al.* 2020). Furthermore, all vulture populations remain small and  
76 some are still declining (see Prakash *et al.* 2015; Paudel *et al.* 2016).

77 Diclofenac is not the only vulture-toxic NSAID used to treat cattle in South Asia. Recent  
78 surveys of pharmacies selling veterinary drugs in India, where the greatest variety of NSAIDs  
79 exists, found eleven active ingredients among products (Galligan *et al.* 2020). Furthermore, in a  
80 survey of cattle carcasses available to wild vultures in India, detectable NSAID residues were  
81 found in 16.2% of carcasses (RSPB/BNHS/ERI unpublished data). Only one NSAID,  
82 meloxicam, has been demonstrated to be safe to *Gyps* vultures (Swan *et al.* 2006b; Swarup *et*  
83 *al.* 2007); while four others – carprofen (Fourie *et al.* 2015; Naidoo *et al.* 2017), flunixin (Zorilla  
84 *et al.* 2014; Fourie *et al.* 2015; Herrero-Villar *et al.* 2020), ketoprofen (Naidoo *et al.* 2010b), and  
85 phenylbutazone (Fourie *et al.* 2015) – caused clinical signs of toxicity and/or death in *Gyps*  
86 vultures. Another NSAID, aceclofenac, rapidly metabolised into diclofenac in cattle (Galligan *et*  
87 *al.* 2016) and will, therefore have the same catastrophic effect on vultures. Nimesulide is the  
88 only NSAID to have ever been found in dead vultures in South Asia with visceral gout (a clinical  
89 sign of NSAID toxicity in vultures), and without diclofenac residues (Cuthbert *et al.* 2016,  
90 Nambirajan *et al.* In press), providing indirect evidence of the drug’s toxicity. Nimesulide is  
91 commonly sold in pharmacies for the treatment of cattle in both India (up to 37.3% of  
92 pharmacies sampled within the State of Haryana in 2017) and Nepal (up to 13.7% of  
93 pharmacies sampled within the western Terai in 2016) (Galligan *et al.* 2020). This highlights the  
94 importance and urgency for nimesulide to be safety tested in *Gyps* vultures, the results of which  
95 will inform conservation actions across South Asia.

96 Using the brand of nimesulide found throughout South Asia (‘Nimovet’), we report safety-  
97 testing of the drug in *Gyps* vultures. The safety test consisted of three experimental studies  
98 conducted in South Africa in domesticated cattle *Bos taurus* and wild-rescued *Gyps* vultures  
99 with serious injuries that prevented their release. First, we undertook a pharmacokinetic study of  
100 nimesulide in cattle to determine the time at which the concentration of the drug is at its greatest  
101 in plasma ( $T_{max}$ ). Second, we undertook a tissue residue study of nimesulide in cattle to  
102 determine the highest concentration of the drug among tissues at  $T_{max}$  and used this to calculate

103 the maximum likely exposure (*MLE*) of nimesulide in cattle tissue for *Gyps* vultures at a single  
104 feeding. Third, we undertook a toxicity study of the *MLE* of nimesulide in cattle tissue in  
105 individual *Gyps* vultures to determine the toxicity of the drug at the worst-case scenario. We  
106 chose not to conduct safety testing at lower doses of the drug to minimise the number of birds  
107 exposed to potential harm, both physical and psychological, from the experimental process.

108

## 109 **2. Methods**

### 110 *2.1 Research permission*

111

112 We were permitted to conduct this study by the Research Committee and Ethics Advisory  
113 Committee (EAC2016-02) of the RSPB Centre for Conservation Science, RSPB, UK, and the  
114 Research Committee of the Faculty of Veterinarian Sciences, University of Pretoria, and the  
115 Animal Ethics Committee of the University of Pretoria (V031/13), South Africa. We were  
116 permitted to work on an Endangered species (*Gyps coprotheres*) by the South African  
117 Department of Environment Affairs (Permit S02655). CITES South Africa (permit no: 206268)  
118 and the Medicines Control Council of South Africa (27/2/2 VCT/12/2016) granted us permits to  
119 export vulture and cattle samples from South Africa; while CITES UK (584542/01) and the  
120 Animal Plant Health Agency, Department of Environment, Food and Rural Affairs, UK,  
121 (ITIMP19.0188) granted us permits to import vulture and cattle tissue samples to the UK.

122

### 123 *2.2 Cattle test subjects*

124

125 We used *Bos taurus* cattle in each experiment. Specifically, four (identifier codes: C1-C4)  
126 Friesian cows at 9 months of age in the pharmacokinetics study and four (C5-C8) Nguni cows at  
127 9 months of age in the tissue residue study. We acquired cattle from commercial cattle farmers

128 in Pretoria, South Africa. Cattle were housed in non-quarantine outdoor camps at the University  
129 of Pretoria for one month to ensure they were free of veterinary drugs, according to established  
130 clearance times. One week before experimentation, we moved the cattle to temperature-  
131 controlled stables at the Biomedical Research Centre, University of Pretoria. We provided food,  
132 water and exercise daily to the cattle in both locations; and bedding in the stables. One day  
133 before experimentation, we gave each cow a complete veterinary examination and deemed  
134 them fit and healthy. We monitored the cattle throughout the experiment for signs of adverse  
135 reactions to nimesulide but observed none. The cattle we used in the pharmacokinetics study  
136 were returned to their owners with an enforced three-month withdrawal period. The cattle we  
137 used in the tissue residue study were euthanized at the facility.

138

### 139 *2.3 Vulture test subjects*

140

141 We safety tested nimesulide in Cape vultures (*Gyps coprotheres*): we used two immature  
142 (identifier codes: G32745 and G34994) and two mature (G32746 and G32753) vultures. This  
143 species is known to be sensitive to two other NSAIDs: ketoprofen (Naidoo *et al.* 2010b); and  
144 carprofen (Naidoo *et al.* 2017). Each vulture was found injured in the wild. We rescued and  
145 treated them at VulPro, South Africa, following standard protocols and with the intent of  
146 releasing them when they were deemed fit and healthy enough to survive in the wild. However,  
147 these vultures had serious injuries that made them non-releasable, specifically: G32745 had  
148 one broken leg and one dislocated leg, which made standing and walking impossible; G32746  
149 had a dislocated leg, which made standing and walking impossible; G32753 had a missing hind  
150 toe and severe bumblefoot, which made standing and walking difficult; and G34994 had had a  
151 severely broken wing amputated, which made flying impossible. G32745 had been rescued  
152 days before the toxicity experiment and therefore was only kept in our small hospital aviaries  
153 (dimensions [h x l x w]: 3 x 3 x 6 m). The other three vultures had been rescued several months

154 before the toxicity experiment and had been moved to larger communal aviaries (at least 6 x 8 x  
155 48 m). A day before experimentation, we moved the vultures in the communal aviaries to the  
156 hospital aviaries. In the communal aviaries, vultures were given food (whole pig carcasses),  
157 water, shade, perches and room for short flapping flight. In the hospital aviaries, vultures were  
158 given food, water, shade, perches and a small shed for shelter. We fed all vultures following a  
159 standard regime but stopped feeding two days before the first day of the toxicity experiment.  
160 One day before the first day of the toxicity experiment, we gave each vulture a complete  
161 veterinary examination and deemed them fit and healthy aside from their injuries described  
162 above. We resumed feeding with a small meal (i.e., 250 g of mixed pig tissues) one day after  
163 the first day of the toxicity experiment. At the end of the toxicity study, we returned surviving  
164 vultures to large communal aviaries and standard feeding regimes (Wolter, Nesor and  
165 Hirschauer 2015).

166

#### 167 *2.4 Pharmacokinetics experiment in cattle*

168

169 We weighed each cow ( $n = 4$ , mean  $\pm$  SD = 209.25  $\pm$  7.63 kg). Next, we collected a 10-ml  
170 sample of blood from the jugular vein of each cow into an evacuated heparinised tube. Then, we  
171 treated each cow once with an injectable formulation of nimesulide (Nimovet, Indian  
172 Immunologicals Ltd., India) intramuscularly at the standard dose of 2 mg kg<sup>-1</sup> bw. Following this  
173 dosing, we collected blood samples from each cow into evacuated heparin tubes at 0.25, 0.75,  
174 1.50, 2.00, 3.00, 5.00, 7.00, 9.00, 12.00, 24.00, 36.00, 48.00, 96.00 and 120.00 h after dosing.  
175 We centrifuged all samples within 2 h at ~3000 g for 15 min, and transferred the supernatant  
176 (plasma) into plastic screw-top vials and stored the vials at -80 °C.

177

#### 178 *2.5 Tissue residue experiment in cattle*

179

180 We undertook this second experiment once we had obtained data from the first experiment (see  
181 method below). Approximately two months separated these experiments. We weighed each  
182 cow ( $n = 4$ , mean  $\pm$  SD = 175.50  $\pm$  20.14 kg). We then treated them intramuscularly with double  
183 the recommended dose of nimesulide (Nimovet; i.e., 4 mg kg<sup>-1</sup> body weight (bw)) once a day for  
184 three days. We doubled the dose to simulate the apparent behaviour of veterinarians and  
185 livestock owners in South Asia, based on measured NSAID residues in the tissues of dead  
186 cattle that show that these animals sometimes received much more than the recommended  
187 dose of various drugs (Taggart *et al.* 2007), especially as an animal's ailment progresses  
188 towards the end of its life. We gave all injections on one side of the neck of the cattle. We  
189 slaughtered the cattle at  $T_{max}$  using a captive bolt and pithing. We harvested muscle from the  
190 injection site at the side of the neck and muscle from the hindquarters (hereafter, non-injection  
191 site muscle). We also harvested the liver and one kidney from each cow. We took three  
192 replicate samples from the injection site muscle and a single sample from each of the other  
193 tissues. We stored samples and harvested tissues at -80 °C.

194

## 195 *2.6 Calculating the MLE and dose of nimesulide for individual vultures*

196

197 First, we calculated the mean daily energy use ( $DEU$  in kJ d<sup>-1</sup>) for individual vultures as  $DEU =$   
198  $668.4 * W_i^{0.622}$  (Mundy *et al.* 1992), where  $W_i$  is the bodyweight for the individual vulture  $i$ .

199 Second, we calculated the maximum likely meal ( $M_i$  in kg) for individual vultures as  $M_i =$

200  $3 * (DEU/EG)$ , where  $EG$  is the content of assimilable energy of ungulate tissue (5160 kJ kg<sup>-1</sup>),

201 which is the product of its energy content (6000 kJ kg<sup>-1</sup>) and the proportion of ingested energy

202 that is assimilated by a vulture (0.86). Observations of Cape vultures suggests that the

203 maximum meal size of *Gyps* vultures is typically about three times the maximum amount of food

204 required per day (S. Piper, quoted in Swan *et al.* (2006a), Supplementary Information, Protocol

205 S1). If the mean weight of the tissue with the highest mean concentration of nimesulide ( $V_{max}$ )



206 was greater than  $M_i$ , we calculated the  $MLE$  for individual vultures as  $MLE = R_{max} * M_i$ , where  
207  $R_{max}$  is the mean concentration of nimesulide in the tissue with the highest mean concentration.  
208 If  $V_{max}$  was less than  $M_i$ , we calculated the maximum likely exposure ( $MLE$  in mg) for individual  
209 vultures as  $MLE = R_{max} * V_{max} + R_{next} * (M_i - V_{max})$ , where  $R_{next}$  is the mean concentration of  
210 nimesulide in the tissue with the second highest mean concentration. We calculated the dose in  
211  $\text{mg kg}^{-1}$  ( $D_1$ ) as  $D_1 = MLE/W_i$  for individual vultures and ml ( $D_2$ ) as  $D_2 = (MLE * W_i)/U$  for individual  
212 vultures, where  $U$  was the concentration of nimesulide (Nimovet) used ( $100 \text{ mg ml}^{-1}$ ).

213

### 214 *2.7 Toxicity experiment in Gyps vultures*

215

216 We undertook this third experiment once we had obtained data from the second experiment  
217 (see method above and below). Approximately four months separated these experiments. We  
218 assigned G32745 and G32746 to the treatment group and G32753 and G34994 to the control  
219 group. We did this non-randomly because the injuries of G32745 and G32746 impacted more  
220 on their lives than those of the other two vultures and we had planned to euthanize them  
221 irrespective of the outcome of the toxicity experiment. As a result, each treatment group  
222 consisted of one mature and one immature bird. Before the first blood sampling, birds were  
223 deemed to be clinically healthy, with the exception of their particular injury. We began the  
224 toxicity experiment by weighing each vulture and collected a baseline blood sample. We fitted a  
225 catheter into the tarsal vein of three vultures (G32745, G32746 and G34994) to collect blood,  
226 but were unable to fit a catheter to the remaining vulture; hence, we used a syringe to collect  
227 blood from that vulture (G32753). To facilitate the flow of blood in vultures with catheters, each  
228 time we sampled blood, we first injected 1 ml of heparinised saline and immediately drew and  
229 discarded 1 ml of blood; we then collected 5 ml of blood and injected another 1 ml of  
230 heparinised saline. Blood was collected into heparinised tubes. We then gave the treatment  
231 group a dose of injectable nimesulide (Nimovet) based on the  $MLE$  of nimesulide for a vulture of

232 their body weight (17.58 mg/kg body weight (bw)). The drug was given orally via a syringe  
233 followed by 2 ml of water. We gave the control group an oral dose of 5 ml of water. We then  
234 sampled 5 ml of blood into heparinised tubes as above from each vulture at 2, 6, 12, 24 and 48  
235 h after dosing. We centrifuged all blood samples within 15 minutes at ~3300 g for 15 min and  
236 transferred the plasma (supernatant) into two plastic screw-top vials. Vials were initially stored in  
237 a standard freezer but were transferred to a -80 °C freezer within 30 h. We observed vultures  
238 regularly throughout daylight hours (05:00-18.30) for 7 days after dosing and recorded any  
239 abnormal behaviour. Our specialist veterinary pathologist (N. Duncan, Department of  
240 Paraclinical Sciences, Faculty of Veterinary Science, University of Pretoria) performed post  
241 mortem examinations on all vultures that died.

242

#### 243 *2.8 Analysing samples for nimesulide concentration*

244

245 We transported the plasma and tissue samples from cattle and one set of plasma samples from  
246 vultures on dry ice to SAC Veterinary Consulting Services, Scotland's Rural College (SRUC),  
247 UK. We extracted 0.3-ml subsamples from each plasma sample and three 0.5-g subsamples  
248 from each tissue sample into 3 ml of HPLC grade acetonitrile. For plasma samples, we vortex  
249 mixed for 20 s, rested at room temperature for 600 s and vortex mixed again for another 20 s,  
250 before centrifuging. For tissue, we homogenised with a VDI 12 (VWR) homogeniser, before  
251 centrifuging. In both cases, we centrifuged at 2000 rpm, 671 g for 600 s, and transferred the  
252 supernatant directly into amber 2-ml screw-top LC vials using a syringe filter (0.2 µm HDPE  
253 disposable) and stored the supernatant at -20°C. We analysed extracts for nimesulide  
254 concentration at the Environmental Research Institute (ERI), University of the Highlands and  
255 Islands, UK. Nimesulide concentrations were determined using liquid chromatography-  
256 electrospray ionisation triple quadrupole mass spectrometry (LC-ESI-MS/MS) utilising a  
257 methodology adapted after Taggart et al. (2009). Nimesulide was detected in

258 negative ion mode utilising a parent target mass of 307 m z<sup>-1</sup> and two daughter ions of 229 m z<sup>-1</sup>  
259 (quantitation) and 198 m z<sup>-1</sup> (confirmation) in multiple reaction monitoring (MRM) mode. Mean  
260 recovery of nimesulide spiked into blank plasma (n = 8) and liver tissue (n = 6) at  
261 two different concentration levels and extracted as above was 89.2% and 140.0% respectively.  
262 Final concentrations were calculated following correction for these extract recovery levels. The  
263 limit of quantification for the analysis was 4 ng ml<sup>-1</sup> and 10 ng g<sup>-1</sup> for plasma and tissue  
264 respectively.

265

## 266 2.9 Pharmacokinetic evaluation

267

268 Pharmacokinetic parameters for vulture plasma samples were ascertained by non-  
269 compartmental modelling in Kinetica 5.1 (Thermo 2012). The maximum plasma concentration  
270 ( $C_{max}$ ) and the time to reach it ( $T_{max}$ ) were read from the plasma concentration versus time  
271 profile. The last quantifiable time point  $C_{last}$  and the linear trapezoidal rule was used to calculate  
272 the area under the curve ( $AUC_{last}$ ) and the area under the moment curve ( $AUMC_{last}$ ) as ( $AUC_{last}$   
273 =  $\Sigma([T_{last} - T_{last-1}] * [C_{last} + C_{last-1}] / 2)$ ) and ( $AUMC_{last} = \Sigma([T_{last} - T_{last-1}] * [T_{last} * C_{last} + T_{last-1} * C_{last-1}] / 2)$ ),  
274 respectively. The elimination rate constant ( $\lambda$ ) was calculated by ordinary least squares  
275 regression of the terminal three points of the curve after natural logarithmic transformation; and  
276 subsequently, the half-life of elimination ( $T_{half}$ ) was calculated as  $\ln(2) / \lambda$ . The mean residence  
277 time ( $MRT$ ) was calculated as  $AUMC_{last} / AUC_{last}$  and the area under the curve to infinity ( $AUC_{inf}$ )  
278 was calculated as  $AUC_{last} + C_{last} / \lambda$ . For nimesulide administered intramuscularly and orally, the  
279 apparent volume of distribution ( $V_z / F$ ) was calculated as  $dose / (AUC_{last} * \lambda)$ , the apparent volume  
280 of distribution at steady state ( $V_{ss} / F$ ) was calculated as  $(dose * MRT) / AUC_{last}$  and the apparent  
281 clearance ( $Cl / F$ ) was calculated as  $dose / AUC_{last}$ ; and for nimesulide administered intravenously,  
282 the actual volume of distribution ( $V_z$ ), actual volume of distribution at steady state ( $V_{ss}$ ) and  
283 actual clearance ( $Cl$ ) were calculated by first finding the fraction of absorption ( $F$ ) and dividing

284 this by the apparent measures of these parameters.  $F$  was calculated as a bird's extravascular  
285  $AUC_{inf}$  divided by the pooled  $AUC_{inf}$  from the intramuscular profile. All parameters are presented  
286 as geometric means with standard deviations.

287

## 288 *2.10 Analysing samples and vultures for clinical pathology*

289

290 The second set of plasma samples from vultures were analysed by the Veterinary Clinical  
291 Pathology Laboratory, University of Pretoria. Standard analytes were measured using a Cobas  
292 Integra 400. We were particularly interested in the changes in concentrations of alanine  
293 transferase (ALT), alkaline phosphatase (ALP), potassium, sodium, calcium, urea and uric acid,  
294 all of which are known indicators of renal failure (Naidoo *et al.* 2017). Change in analyte  
295 concentrations was considered important if a value at a given time was different to the 1)  
296 baseline value, 2) previous measured value, and 3) higher or lower than the normal range of  
297 values delineated by the highest and lowest value among those for the control group at any time  
298 during the series.

299

## 300 *2.11 Post-mortem examination of vultures*

301

302 We performed a post-mortem examination on all vultures that died during the toxicity test. We  
303 began with a terminal blood sample collected, processed and analysed as described above. We  
304 performed a necropsy, focussing on the viscera since visceral gout – the accumulation of urates  
305 on the viscera – was associated with toxic death in *Gyps* vultures during safety testing of  
306 diclofenac (Oaks *et al.* 2004; Swan *et al.* 2006a), ketoprofen (Naidoo *et al.* 2010b) and  
307 carprofen (Naidoo *et al.* 2017). Visceral gout in birds results from renal failure. *Gyps* vultures  
308 show zero-order elimination after exposure to some NSAIDs, which suggests that they have  
309 limited enzyme capacity for processing these drugs (Naidoo *et al.* 2010a; Naidoo *et al.* 2017).

310 An inability to process some NSAIDs leads to renal failure and presents as visceral gout on  
311 necropsy. Tissue samples were collected during the necropsy, fixed in 10% buffered formalin  
312 and routinely processed, embedded in paraffin wax and cut at 4  $\mu\text{m}$ . After mounting, the  
313 sections were stained routinely with Haematoxylin and Eosin (H&E).

314

### 315 **3. Results**

316

#### 317 *3.1 Pharmacokinetics experiment in cattle*

318

319 Plasma concentrations versus time profiles among cattle C1-C4 were consistent. The greatest  
320 concentrations of nimesulide in individual cattle ranged between 25.68 and 34.80  $\mu\text{g ml}^{-1}$ . The  
321 greatest mean concentration among cattle ( $C_{max}$ ) was 28.90  $\mu\text{g ml}^{-1}$ , which was measured at 3 h  
322 after dosing; therefore,  $T_{max}$  was 3 h (Supplementary Figure 1).

323

#### 324 *3.2 Tissue residue experiment in cattle*

325

326 The tissue with the highest mean concentration of nimesulide  $R_{max}$  among cattle C5-C8 was the  
327 injection site muscle at 134.08  $\text{mg kg}^{-1}$  (Supplementary Table 1), and its mean weight,  $V_{max}$ , was  
328 1.11 kg (Supplementary Table 2).

329

#### 330 *3.3 Calculating the MLE and dose of nimesulide for individual vultures*

331

332 The two vultures to be treated with nimesulide shared a  $W_i$  of 8.5 kg and therefore their  $M_i$  was  
333 1.47 kg. Since this  $M_i$  was greater than  $V_{max}$ , we calculated the MLE as  $R_{max} * V_{max} + R_{next} * (M_i -$   
334  $V_{max})$ , where  $R_{next}$  was the concentration of the non-injection site muscle at 0.945  $\text{mg kg}^{-1}$

335 (Supplementary Table 1). We calculated an  $MLE$  of  $149.44 \text{ mg kg}^{-1}$ , a  $D_1$  of  $17.58 \text{ mg kg}^{-1}$  and a  
336  $D_2$  of  $1.49 \text{ ml}$  (rounded to  $1.50 \text{ ml}$ ) for both G32745 and G32746.

337

### 338 *3.4 Toxicity experiment in Gyps vultures*

339

340 Vulture G32745 showed no immediate adverse reaction to nimesulide, whereas vulture G32746  
341 attempted to spit out the drug. G32746 may have received a lower unknown dose as it was  
342 observed expelling liquid, although  $C_{max}$  was similar for both birds (see below), so G32746 likely  
343 received a substantial amount of the dose. From 3-4 h after dosing until 25-26 h after dosing,  
344 both G32745 and G32746 showed relief from pain and were observed standing and walking.  
345 Beyond 25-26 h after dosing, both vultures showed signs of toxicity. G32746 lay awkwardly on  
346 its side with its wings spread, head and neck often on the ground and eyes often shut. G32745  
347 lay awkwardly on its front with wings spread, but head and neck raised and eyes open. Both  
348 vultures showed laboured breathing, raised rectal lumps and spayed regimens. G32745 died  
349 27.50 h after dosing, despite appearing less effected by nimesulide than G32746, which died  
350 29.34 h after dosing. The control group (G32753 and 34994), remained alert and active until the  
351 experiment was terminated, 48 h after dosing.

352

### 353 *3.5 Analysing samples for nimesulide concentration*

354

355 Pharmacokinetic profiles (Figure 1) and parameters (Table 1) were consistent between the two  
356 vultures treated with nimesulide. Both vultures showed rapid absorption in the first six hours,  
357 followed by a slower elimination over the next 18-23 hours before their deaths (Figure 1). They  
358 shared a  $T_{max}$  value and had similar  $C_{max}$  values (Table 1). Vulture 32746 showed a greater  
359 extent of absorption and faster elimination than 32745 (Figure 1), which was reflected in several  
360 parameters associated with the area under the curve, mean residence time and elimination

361 (Table 1). The terminal concentration in 32756 (and probably 32745) was the lowest after  
362 dosing (Figure 1).

363

### 364 *3.6 Analysing samples for clinical pathology*

365

366 The two treated vultures showed increases in plasma uric acid and potassium concentrations  
367 above the normal ranges for each analyte (Figure 2). Both vultures showed uric acid  
368 concentrations above our maximum level of detection (15 mmol/L) at 24 h, which represented a  
369 minimum 27-79-fold increase over their baseline values. At 24 h, potassium concentrations  
370 showed a 2-4-fold increase over baseline values for each vulture. The treated vultures also  
371 showed slight decreases in plasma calcium concentrations (Figure 2). One treated vulture  
372 (G32745) showed an increase in ALT (which, at 24 h, was 5-times greater than the baseline  
373 value), consistently high concentrations of ALP and consistently low concentrations of sodium;  
374 whereas, the other treated vulture (G32746) showed no change outside the normal range for  
375 ALT, ALP and sodium. At the time of death, G32746 plasma showed its highest potassium  
376 concentration, its lowest concentration of calcium and a level of uric acid slightly lower than at  
377 24 h (Figure 2).

378

### 379 *3.7 Post-mortem examination of vultures*

380

381 A terminal blood sample was obtained from G32746 at 28.09 h after dosing, but not from  
382 G32745. Post mortem examination found visceral gout in both vultures in the form of small and  
383 scattered tophi (i.e., deposits of crystalline uric acid) in the kidneys, spleen, lungs and liver.  
384 Histopathology found several lesions in association with these tophi in both vultures; and  
385 necrosis in the form of pyknosis, karyorrhexis, and desquamation was evident in both vultures  
386 (Figure 3). While G32746 also showed evidence of severe necrotising tracheitis and bacterial

387 emboli in the brain at necropsy, subsequent histopathological evaluation confirmed signs of only  
388 ulcerative tracheitis with adherent fibrin and bacteria with no evidence of CNS damage. The  
389 damaged trachea would have been the entry point for the bacteria, but as there were no signs  
390 of bacterial emboli within the kidney, nor any changes consistent with inflammation within the  
391 kidney, it is unlikely that it affected any of the other parameters. The cause of the tracheitis was  
392 considered incidental and not investigated further, since we were confident of the cause of death.

393

#### 394 **4. Discussion**

395 Our study supports the contention of Cuthbert *et al.* (2016) that nimesulide in cattle carcasses is  
396 killing *Gyps* vultures in South Asia. We safety tested nimesulide in an African *Gyps* species that  
397 is an appropriate surrogate test species for South Asia's Critically Endangered *Gyps* species  
398 (Swan *et al.* 2006a). We gave nimesulide directly by the oral route, at twice the recommended  
399 dose, a level that is likely encountered by *Gyps* vultures in the wild, given that ailing cattle can  
400 receive progressively larger doses when close to death. The vultures absorbed the drug rapidly  
401 but eliminated it slowly. Nimesulide provided pain relief to the vultures throughout most of the  
402 absorption and elimination periods; however, uric acid started to accumulate with the onset of  
403 the elimination period and reached extremely high levels well before the end of the elimination  
404 period. This accumulation of uric acid killed the vultures as tophi affected numerous organs (*i.e.*,  
405 visceral gout) causing widespread lesions and high concentrations of potassium in plasma is  
406 consistent with blood chemistry changes associated with cardiac failure (Sturkie 1986, Zandvliet  
407 2005) and low concentrations of calcium in plasma likely indicated renal failure (Lierz 2003).  
408 Toxicity was only apparent in the vultures' behaviour hours before death when concentrations of  
409 uric acid in plasma were extremely high. Behavioural, haematological, and histopathological  
410 evidence for nimesulide toxicity in *Gyps* vultures was similar to that for diclofenac (Oaks *et al.*  
411 Meteyer *et al.* 2005) and carprofen toxicity (Naidoo *et al.* 2017) in *Gyps* vultures. The vultures



412 died with hours of each other, but G32745, an immature vulture, showed a slower rate of  
413 elimination than G32746, a mature vulture. Interestingly, G32745 also showed further signs of  
414 liver damage in tissue as well as in plasma. The increase in plasma ALP at the predisposed  
415 point (5 min before treatment) would indicate a pre-existing disease was present. Given its  
416 substantially high values, this is most likely linked to its known bone injury, as this is a known  
417 cause of substantial increases in serum ALP activity (Harr 2002). We did not test either vulture  
418 for infections or disorders that may have caused such pre-existing disease. However, the  
419 damage within the liver was just that of scattered tophi and necrosis. The hepatocytes  
420 themselves, as well as the bile ducts, did not show any changes consistent with exposure to  
421 hepatotoxins or viral / bacterial agents. Also, vulture G32746 spat out an unknown amount of  
422 nimesulide and the differences in response between the two vultures may be a result, at least in  
423 part, due to a difference in actual doses between vultures. Despite these differences that may  
424 have had an effect on finer details of their deaths, both vultures died in little more than a day  
425 after exposure to nimesulide at a level that is likely encountered by *Gyps* vultures in the wild.

426         In cattle, nimesulide was detected in the circulatory system not long after treatment;  
427 however, much of the drug remained at the injection site, resulting in a larger concentration in  
428 this muscle than in organs of the urinary system. There was also individual variation in drug  
429 absorption among cattle. Similar results were obtained for the NSAID, carprofen, in a similarly  
430 designed experiment to safety-test that drug in *Gyps* vultures (Naidoo et al. 2017). In both  
431 studies, we calculated the worst-case scenario dose for vultures based on the concentrations  
432 present at the injection site. Whereas only one of two vultures died when given a dose of  
433 carprofen, both vultures died when given nimesulide. However, the sample of vultures used in  
434 this study is too small to conclude that individual variation doesn't exist in the population. Safety  
435 testing of carprofen also showed that doses of the drug based on (lower) concentrations found  
436 in organs did not kill vultures (although, once again, a small sample conceals possible individual  
437 variation). The present study was designed to evaluate the worst-case scenario, therefore we

438 are confident that a bird feeding on tissues from the injection site will succumb to toxicity.  
439 Similarly high NSAID concentrations have been found in dead vultures (e.g., flunixin, Zorrilla *et*  
440 *al.* 2014), suggesting some birds are exposed to elevated drug levels through consuming the  
441 carcass of a recently-treated animal and/or tissues with high drug concentrations. However, our  
442 study cannot identify the level of toxicity that may result from the consumption of lower  
443 concentrations of the drug found in other areas of the carcass, as we are yet to establish the  
444 lower threshold for toxicity, i.e., the median lethal dose (LD50) may be lower than the  
445 concentrations evaluated in this study. From general toxicity principles, the LD50 tends to be  
446 determined by an individual's inherent hepatic metabolising capacity and the rate of drug  
447 elimination. For another NSAID, ketoprofen, there was marked variation between individuals,  
448 with toxicity only being seen in those birds where zero order metabolism has been reached  
449 (Naidoo *et al.* 2010a). To clarify this further would thus require a larger sample size; however,  
450 we considered subjecting a larger sample of an endangered vulture species to lethal, as well as  
451 sub-lethal, but harmful, concentrations of nimesulide and the physical and psychological stress  
452 of the experimental process unethical and unnecessary. Our objective was to test whether  
453 nimesulide could kill vultures at exposure levels that could be encountered in the wild, and we  
454 have shown that it can. Dead wild *Gyps* vultures have previously been found in India with  
455 nimesulide residues and signs of renal failure (Cuthbert *et al.* 2016, Nambirajan *et al.* 2021); we  
456 provide experimental confirmation of this NSAID's toxicity to vultures.

457 Nimesulide is metabolised quickly in cattle, therefore treated individuals would have to  
458 die shortly after administration to maintain the high concentrations observed in this study.  
459 However, this is not impossible, because NSAIDs are often given daily as part of palliative care  
460 for dying cattle in South Asia (V Prakash pers. comm.). In addition, metabolism in dying cattle is  
461 most likely to be slower than in young and healthy cattle that were treated in this study; thereby,  
462 dying cattle likely show slower elimination and thereby greater periods at high concentrations.  
463 We used double the recommended dose of nimesulide here, but again this reflects the use of

464 other NSAIDs in South Asia (Taggart *et al.* 2009), which might also be linked to palliative care of  
465 dying cattle. While we did not feed vultures nimesulide-rich cattle tissue, but administered the  
466 drug orally, thus controlling for the route of absorption in vultures. We acknowledge that it is  
467 possible that vultures absorb nimesulide in a liquid at a faster rate than nimesulide in a solid  
468 (muscle) as a result of crop retention. However, this is unlikely to interfere much with overall  
469 exposure to the drug as the crop would only delay food entering the stomach by a few hours.  
470 While the impact of food on NSAID absorption in vultures is yet to be established due to the  
471 complexities of regurgitation as a natural defence after feeding, evidence from human studies  
472 has shown no major impact of meals on NSAID pharmacokinetics with absorption being delayed  
473 by a few hours (Moore *et al.* 2015). Thus while uncertainty exists in aspects of our experimental  
474 design, we are satisfied that we have simulated a realistic scenario for nimesulide exposure to  
475 vultures in South Asia.

476 Nimesulide concentrations in cattle liver were extremely low at the same time after  
477 dosing that it was extremely high in plasma; while it was high to extremely high in muscle,  
478 particularly close to the injection site. Drug concentrations in the renal organs are not expected  
479 to increase during the drug's elimination phase. As a result, detecting nimesulide in the liver of  
480 dead cattle in the field is expected to be difficult, which supports the idea that the cattle carcass  
481 surveys for NSAIDs to date that sampled liver tissue only do not detect nimesulide despite its  
482 widespread availability and frequent sales from pharmacies selling drugs for animals (Galligan  
483 *et al.* 2020). Whether this phenomenon is unique to nimesulide is unknown. Carprofen is the  
484 only other NSAID that has been subject to a tissue residue experiment in cattle, which found the  
485 drug in similar concentrations in the liver, kidneys and non-injection site muscle at  $T_{max}$  (Naidoo  
486 *et al.* 2017). Despite this, carprofen concentration, like nimesulide, is highest in muscle close to  
487 the injection site (Naidoo *et al.* 2017). For these reasons, future cattle carcass surveys should  
488 sample muscle from either side of the neck in addition to liver tissue to obtain more accurate  
489 data on a wider range of NSAIDs used to treat cattle in South Asia. As a consequence, great

490 caution should be taken in interpreting the prevalence of nimesulide from current published and  
491 unpublished data from cattle carcass surveys that did not test for nimesulide in injection site  
492 muscle.

493 Like all NSAIDs, nimesulide inhibits the enzyme cyclo-oxygenase (COX) and thereby the  
494 synthesis of prostaglandins (Bennett and Vila 2000). More specifically, nimesulide is a COX-2  
495 inhibitor, which better targets pain and inflammation and thereby causes fewer gastrointestinal  
496 complications (Suleyman et al. 2008). Nimesulide has analgesic, antipyretic and anti-  
497 inflammatory properties (Bennett and Vila 2000). The vulture-safe NSAID meloxicam is also a  
498 COX-2 inhibitor and confers similar benefits to treated animals (e.g. European Medicines  
499 Agency 2018). Meloxicam also outperforms nimesulide in its effectiveness and relative safety to  
500 the target animals (usually mammalian livestock and pets; SAVE 2016). A review of  
501 experimental and clinical studies reporting effects of nimesulide and meloxicam treatment in  
502 non-human mammals, found 117 studies for meloxicam and only one study for nimesulide  
503 (SAVE 2016). The single study examining the effects of nimesulide also examined the effects of  
504 meloxicam: of 12 healthy dogs *Canis lupus familiaris* treated with standard daily doses over 10  
505 days, those given nimesulide showed evidence of renal damage while those given meloxicam  
506 did not (Borges *et al.* 2013). Among all the studies examining the effect of meloxicam, 79%  
507 reported a positive effect (e.g. decreased pain level, increased recovery rate, no complications),  
508 9% a mixed effect, 3% a negative effect, and 9% reported no effect (SAVE 2016). The paucity  
509 of published evidence for the efficacy and safety of nimesulide as a veterinary drug should raise  
510 concern over its use.

511 It is important to note that this study was funded and carried out through a collaboration  
512 of conservation non-government organisations and academic institutions; in the future, the  
513 responsibility for testing the impacts of drugs on non-target animals should fall on the  
514 pharmaceutical industry, and be carried out *before* the drugs are licensed for veterinary use.  
515 Furthermore, we call for a comprehensive ban on the manufacture, distribution, retail and use of

516 all forms of nimesulide in South Asia, except for single-dose vials of human formulations. This  
517 will not affect the welfare of domesticated animals as a safer and more effective alternative,  
518 meloxicam, is already common and widely available. South Asia's critically endangered *Gyps*  
519 vultures will not recover and the actions to date to rid the region of diclofenac will be severely  
520 undermined if treatment of domesticated animals with nimesulide is allowed to continue.

521

522

### 523 **CRedit authorship contribution statement**

524 **Toby Galligan:** Conceptualization, Methodology, Formal analysis, Investigation, Data Curation,  
525 Writing – Original Draft. **Rhys Green:** Conceptualization, Methodology, Writing – Review &  
526 Editing. **Kerri Wolter:** Resources. **Mark Taggart:** Methodology, Formal Analysis, Investigation,  
527 Resources, Data Curation, Writing – Review & Editing. **Neil Duncan:** Methodology, Formal  
528 Analysis, Investigation, Resources. **John Mallord:** Writing – Review & Editing, Project  
529 administration. **Dawn Alderson:** Project administration. **Yuan Li:** Formal analysis, Investigation.  
530 **Vinny Naidoo:** Conceptualization, Methodology, Formal analysis, Investigation, Resources,  
531 Writing – Original Draft

532

### 533 **Declaration of competing interest**

534 The authors declare that they have no known competing financial interests or personal  
535 relationships that could have appeared to influence the work reported in this paper.

536

### 537 **Acknowledgements**

538 We thank J. Chipangura, R. Mavunganidze and A. van Wyk for technical support in completing  
539 the experiments involving cattle; D. Svobodova for assistance in NSAID extraction and analysis;  
540 V. Prakash and C. Bowden for obtaining the nimesulide used in this study. This study was  
541 funded by the RSPB Centre for Conversation Science, which in turn is funded by the members

542 of the RSPB. The rescue and rehabilitation work of VulPro is funded by the Columbus Zoo,  
543 Colchester Zoo, Dallas Zoo, Detroit Zoological Society, DHL, Braak Trust, Hans Hoheisen  
544 Charitable Trust, Lomas Wildlife Protection Trust, Natural Encounters Inc. and The Tusk Trust.

545

## 546 **References**

547

548 Acharya, R., Cuthbert, R., Baral, H.S. & Shah, K.B. (2009) Rapid population declines of  
549 Himalayan Griffon Gyps himalayensis in Upper Mustang, Nepal. *Bird Conservation International*  
550 19: 99–107.

551 Acharya, R., Cuthbert, R., Baral, H.S. & Chaudhary, A. (2010) Rapid decline of the Bearded  
552 Vulture Gypaetus barbatus in Upper Mustang, Nepal. *Forktail* 26: 117-120.

553 Arnold, K.E., Brown, A.R., Ankley, G.T. & Sumpter, J.P. (2014) Medicating the environment:  
554 assessing the risks of pharmaceuticals to wildlife and ecosystems. *Philosophical Transactions*  
555 *of the Royal Society B* 369: 20130569.

556 Bean, T.G., & Rattner, B.A. (2018) Environmental contaminants of healthcare origin: exposure  
557 and potential effects in wildlife. pp. 87-122 in *Health Care and Environmental Contaminants*. A.  
558 Boxall & R. Kookana (Eds). Elsevier.

559 Bennett, A. & Vila, D. (2000) Nimesulide - a non-steroidal anti-inflammatory drug, a preferential  
560 cyclooxygenase-2 inhibitor. *Expert Opinion on Pharmacotherapy* 1(2): 277-286.

561 BirdLife International (2017) The IUCN Red List of Threatened Species:

562 e.T22695180A154895845. <http://doi.org/10.2305/IUCN.UK.2019->

563 [3.RLTS.T22695180A154895845.en](http://doi.org/10.2305/IUCN.UK.2019-3.RLTS.T22695180A154895845.en). Downloaded on 29 January 2021.

564 Borges, M., Filho, R.M., Laposy, C.B., Guimaraes-Okamoto, P.T.C., Chaves, M.P., Le Sueur  
565 Vieira, A. & Melchert, A. (2013) Nonsteroidal anti-inflammatory therapy: changes on renal  
566 function of healthy dogs. *Acta Cirurgica Brasileira* 28: 842-847.

567 Chaudhary, A., Subedi, T.R., Giri, J.B., Baral, H.S., Bidari, B., Subedi, H., Chaudhary, B.,  
568 Chaudhary, I., Paudel, K. & Cuthbert, R.J. (2012) Population trends of Critically Endangered  
569 Gyps vultures in the lowlands of Nepal. *Bird Conservation International* 22: 270-278.

570 Cuthbert, R., Green, R.E., Ranade, S., Saravanan, S., Pain, D.J., Prakash, V., Cunningham,  
571 A.A. (2006) Rapid population declines of Egyptian vulture (*Neophron percnopterus*) and red-  
572 headed vulture (*Sarcogyps calvus*) in India. *Animal Conservation* 9: 349-354.

573 Cuthbert, R.J., Taggart, M.A., Saini, M., Sharma, A., Das, A., Kulkarni, M.D., Deori, P., Ranade,  
574 S., Shringarpure, R.N., Galligan, T.H. & Green, R.E. (2016) Continuing mortality of vultures in  
575 India associated with illegal veterinary use of diclofenac and a potential threat from nimesulide.  
576 *Oryx* 50: 104-112.

577 European Medicines Agency (2018) Metacam (Meloxicam) : an overview of Metacam and why it  
578 is authorized in the EU. European Medicines Agency, London. *EMA/CVMP/259397/2006*

579 Fourie, T., Cromarty, D., Duncan, N., Wolter, K., Naidoo, V. (2015) The safety and  
580 pharmacokinetics of carprofen, flunixin and phenylbutazone in the Cape Vulture Gyps  
581 coprotheres following oral exposure. *PloS One* 10: e0141419.  
582 <https://doi.org/10.1371/journal.pone.0141419>

583 Galligan, T.H., Amano, T., Prakash, V.M., Kulkarni, M., Shringarpure, R., Prakash, N., Ranade,  
584 S., Green, R.E., Cuthbert, R.J. (2014) Have population declines in Egyptian vulture and red-  
585 headed vulture in India slowed since the 2006 ban on veterinary diclofenac? *Bird Conservation*  
586 *International* 24: 272-28.

587 Galligan, T.H., Taggart, M., Cuthbert, R.J., Svobodova, D., Chipangura, J., Alderson, D.,  
588 Prakash, V., Naidoo, V. (2016) Metabolism of aceclofenac in cattle to vulture-killing diclofenac.  
589 *Conservation Biology* 30: 1122-1127.

590 Galligan, T.H., Bhusal, K.P., Paudel, K., Chapagain, D., Joshi, A.B., Chaudhary, I.P.,  
591 Chaudhary, A., Baral, H.S., Cuthbert, R.J., Green, R.E. (2019) Partial recovery of Critically  
592 Endangered Gyps vulture populations in Nepal. *Bird Conservation International* 30: 1-16.

593 Galligan, T.H., Mallord, J.W., Prakash, V.M., Bhusal, K.P., Sarowar Alam, A.B.M., Anthony,  
594 F.M., Dave, R., Dube, A., Shastri, K., Kumar, Y., Prakash, N., Ranade, S., Shringarpure, R.,  
595 Chapagain, D., Chaudhary, I.P., Joshi, A.B., Paudel, K., Kabir, T., Ahmed, S., ... Green, R.E.  
596 (2020). Trends in the availability of the vulture-toxic drug, diclofenac, and other NSAIDs in South  
597 Asia, as revealed by covert pharmacy surveys. *Bird Conservation International*  
598 <http://doi.org/10.1017/S0959270920000477>

599 Green, R., Newton, I., Shultz, S., Cunningham, A., Gilbert, M., Pain, D. & Prakash, V. (2004)  
600 Diclofenac Poisoning as a Cause of Vulture Population Declines across the Indian  
601 Subcontinent. *Journal of Applied Ecology* 41: 793-800.

602 Green, R.E., Taggart, M.A., Senacha, K.R., Raghavan, B., Pain, D.J., Jhala, Y., Cuthbert R.  
603 (2007) Rate of decline of the oriental white-backed vulture population in India estimated from a  
604 survey of diclofenac residues in carcasses of ungulates. *PLoS ONE* 2(8): e686.  
605 doi:10.1371/journal.pone.0000686

606 Harr, K.E. (2002) Clinical chemistry of companion avian species: a review. *Veterinary Clinical*  
607 *Pathology*, 31: 140-151.

608 Herrero-Villar, M., Velarde, R., Camarero, P.R., Taggart, M.A., Bandeira, V., Fonseca, C.,  
609 Marco, I. & Mateo, R. (2020) NSAIDs detected in Iberian avian scavengers and carrion after  
610 diclofenac registration for veterinary use in Spain. *Environmental Pollution* 266: 115-157.



- 611 Hutchinson, T.H., Madden, J.C., Naidoo, V. & Walker, C.H. (2014) Comparative metabolism as  
612 a key driver of wildlife species sensitivity to human and veterinary pharmaceuticals.  
613 *Philosophical Transactions of The Royal Society B Biological Sciences* 369: 20130583.  
614 <http://dx.doi.org/10.1098/rstb.2013.0583>
- 615 Lierz, M. (2003) Avian renal disease: pathogenesis, diagnosis, and therapy. *The veterinary*  
616 *clinics of North America. Exotic animal practice*, 6(1), 29-55.
- 617 Meteyer, C. U., Rideout, B. A., Gilbert, M., Shivaprasad, H. L. & Oaks, J. L. (2005) Pathology  
618 and proposed pathophysiology of diclofenac poisoning in free-living and experimentally exposed  
619 Oriental White-backed Vultures (*Gyps bengalensis*) *Journal of Wildlife Diseases* 41(4): 707-716.
- 620 Moore, R.A., Derry, S., Wiffen, P.J. and Straube, S., 2015. Effects of food on pharmacokinetics  
621 of immediate release oral formulations of aspirin, dipyron, paracetamol and NSAIDs – a  
622 systematic review. *British Journal of Clinical Pharmacology*, 80: 381-388.
- 623 Mundy, P.J., Butchart, D., Ledger, J., Piper, S. 1992. *The Vultures of Africa*. Acorn,  
624 Johannesburg, South Africa.
- 625 Naidoo, V., Wolter, K., Cuthbert, R. & Duncan, N. (2009) Veterinary diclofenac threatens  
626 Africa's endangered vulture species. *Regulatory Toxicology and Pharmacology* 53: 205-208.
- 627 Naidoo, V., Venter, L., Wolter, K., Taggart, M. & Cuthbert, R. (2010a) The toxicokinetics of  
628 ketoprofen in *Gyps coprotheres*: Toxicity due to zero-order metabolism. *Archives of Toxicology*.  
629 84: 761-766.
- 630 Naidoo, V., Wolter, K., Cromarty, D., Diekmann, M., Duncan, N., Meharg, A.A., Taggart, M.A.,  
631 Venter, L. & Cuthbert R. (2010b) Toxicity of non-steroidal anti-inflammatory drugs to *Gyps*  
632 vultures: a new threat from ketoprofen. *Biology Letters* 6: 339-341.

- 633 Naidoo, V., Taggart, M., Duncan, N., Wolter, K., Chipangura, J., Green, R. & Galligan, T. (2017)  
634 The use of toxicokinetics and exposure studies to show that carprofen in cattle tissue could lead  
635 to secondary toxicity and death in wild vultures. *Chemosphere* 190: 80-89.
- 636 Oaks, J.L., Gilbert, M., Virani, M.Z., Watson, R.T., Meteyer, C.U., Rideout, B.A., Shivaprasad,  
637 H., Ahmed, S., Chaudhry, M.J.I. & Arshad, M. (2004) Diclofenac residues as the cause of  
638 vulture population decline in Pakistan. *Nature* 427: 630-633.
- 639 Pain, D., Bowden, C., Cunningham, A., Cuthbert, R., Das, D., Gilbert, M., Jakati, R., Jhala, Y.,  
640 Khan, A., Naidoo, V., Oaks, J.L., Parry-Jones, J., Prakash, V., Rahmani, A., Ranade, S.,  
641 Senacha, R., Saravanan, S., Shah, N., Swan, G. & Green, R. (2008) The race to prevent the  
642 extinction of South Asian vultures. *Bird Conservation International* 18: S30-48.
- 643 Paudel, K., Galligan, T., Amano, T., Acharya, R., Chaudhary, A., Baral, H.S., Bhusal, K.P.,  
644 Chaudhary, I.P., Green, R. & Cuthbert, R. (2015) Population trends in Himalayan Griffon in  
645 Upper Mustang, Nepal, before and after the ban on diclofenac. *Bird Conservation International*.  
646 26: 286-292.
- 647 Paudel, K., Bhusal, K., Acharya, R., Chaudhary, A., Baral, H., Chaudhary, I., Green, R.,  
648 Cuthbert, R. & Galligan, T. (2016) Is the population trend of the Bearded Vulture *Gypaetus*  
649 *barbatus* in Upper Mustang, Nepal, shaped by diclofenac? *Forktail* 32: 54-57.
- 650 Prakash, V., Green, R., Pain, D., Ranade, S., Saravanan, S., Prakash, N., Venkitachalam, R.,  
651 Cuthbert, R., Rahmani, A. & Cunningham, A. (2007) Recent changes in populations of resident  
652 Gyps vultures in India. *Journal of the Bombay Natural History Society* 104: 129-135.
- 653 Prakash, V., Galligan, T.H., Chakraborty, S.S., Dave, R., Kulkarni, M.D., Prakash, N.,  
654 Shringarpure, R.N., Ranade, S.P. & Green, R.E. (2017) Recent changes in populations of  
655 Critically Endangered Gyps vultures in India. *Bird Conservation International* 29: 55-70.

656 Saaristo M., Brodin, T., Balshine, S., Bertram, M.G., Brooks, B.W., Ehlman, S.M., McCallum,  
657 E.S., Sih, A., Sundin, J., Wong, B.B.M. & Arnold, K.E. (2018) Direct and indirect effects of  
658 chemical contaminants on the behaviour, ecology and evolution of wildlife. *Proceedings of the*  
659 *Royal Society of London. Series B: Biological Sciences (London)* 285: 20181297.  
660 <http://dx.doi.org/10.1098/rspb.2018.1297>

661 SAVE (2016) Nimesulide: a vulture-toxic drug. RSPB, Sandy. [https://save-vultures.org/wp-](https://save-vultures.org/wp-content/uploads/2019/06/Nimesulide_summary_Nov2016.pdf)  
662 [content/uploads/2019/06/Nimesulide\\_summary\\_Nov2016.pdf](https://save-vultures.org/wp-content/uploads/2019/06/Nimesulide_summary_Nov2016.pdf)

663 SAVE (2020) Report of the 9th Annual Meeting of the Saving Asia's Vultures from Extinction  
664 partnership. RSPB, Sandy. [https://save-vultures.org/wp-content/uploads/2020/03/9th-SAVE-](https://save-vultures.org/wp-content/uploads/2020/03/9th-SAVE-Report.pdf)  
665 [Report.pdf](https://save-vultures.org/wp-content/uploads/2020/03/9th-SAVE-Report.pdf)

666 Sharma, A.K., Saini, M., Singh, S.D., Prakash, V., Das, A., Dasan, B.R., Pandey, S., Bohara,  
667 D., Galligan, T.H., Green, R.E., Knopp, D. & Cuthbert, R.J. (2014) Diclofenac is toxic to the  
668 steppe eagle *Aquila nipalensis*: widening the diversity of raptors threatened by NSAID misuse in  
669 South Asia. *Bird Conservation International* 24: 282-286

670 Shultz, S., Baral, H.S., Charman, S., Cunningham, A.A., Das, D., Ghalsasi, D.R., Goudar, M.S.,  
671 Green, R.E., Jones, A., Nighot, P., Pain, D.J., Prakash, V.. (2004) Diclofenac poisoning is  
672 widespread in declining vulture populations across the Indian subcontinent. *Proceedings of the*  
673 *Royal Society of London B (Supplement)* 271: S458-S460. <http://doi.org/10.1098/rsbl.2004.0223>

674 Sturkie, P.D. (1986) *Avian Physiology*. Springer-Verlag, New York .

675 Swan, G., Naidoo, V., Cuthbert, R., Green, R.E., Pain, D.J., Swarup, D., Prakash, V., Taggart,  
676 M., Bekker, L., Das, D., Diekmann, J., Diekmann, M., Killian, E., Meharg, A., Patra, R.C., Saini,  
677 M. & Wolter, K.. (2006a) Removing the threat of diclofenac to critically endangered Asian  
678 vultures. *PLoS Biology* 4: e66. <http://doi.org/10.1371/journal.pbio.0040066>

679 Suleyman, H., Cadiric, E., Albayrak, A. & Halici, Z. (2008) Nimesulide is a selective COX-2  
680 inhibitory, atypical non-steroidal anti-inflammatory drug. *Current Medicinal Chemistry* 15, 278-  
681 283.

682 Swan, G.E., Cuthbert, R., Quevedo, M., Green, R.E., Pain, D.J., Bartels, P., Cunningham, A.A.,  
683 Duncan, N., Meharg, A.A., Oaks, J.L., Parry-Jones, J., Shultz, S., Taggart, M., Verdoom, G. &  
684 Wolter, K. (2006b). Toxicity of diclofenac to Gyps vultures. *Biology Letters* 2: 279-282.

685 Swarup, D., Patra, R.C., Prakash, V., Cuthbert, R., Das, D., Avari, D.J., Pain, D.J., Green, R.E.,  
686 Sharma, A.K., Saini, M., Das, D. & Taggart, M. (2007) Safety of meloxicam to critically  
687 endangered Gyps vultures and other scavenging birds in India. *Animal Conservation* 10: 192-  
688 198.

689 Taggart, M.A., Senacha, K.R., Green, R.E., Jhala, Y.V., Raghavan, B., Rahmani, A.R.,  
690 Cuthbert, R., Pain, D.J. & Meharg, A.A. (2007) Diclofenac residues in carcasses of domestic  
691 ungulates available to vultures in India. *Environmental International* 33: 759-765.

692 Taggart, M.A., Senacha, K.R., Green, R.E., Cuthbert, R., Jhala, Y.V., Meharg, A.A., Mateo, R. &  
693 Pain, D.J. (2009) Analysis of nine NSAIDs in ungulate tissues available to Critically Endangered  
694 vultures in India. *Environmental Science and Technology* 43: 4561-4566.

695 Ulrika, C. & Wong, B.B.M. (2019) Mate choice in a polluted world: consequences for individuals,  
696 populations and communities. *Proceedings of the Royal Society of London. Series B: Biological*  
697 *Sciences* (London) 374: 20180055 <http://dx.doi.org/10.1098/rstb.2018.0055>

698 Wolter, K. Nesar, W & Hirschauer, M (2015) *Cape vulture Gyps coprotheres captive-breeding*  
699 *protocols* Version 2. Vulpro, Hartbeespoort.

700 Zandvliet, M.M. (2005). Electrocardiography in psittacine birds and ferrets. *Seminars in Avian*  
701 *and Exotic Pet Medicine* 14, 34–51

702 Zorrilla, I., Martinez, R., Taggart, M.A. & Richards, N. (2014) Suspected flunixin poisoning of a  
703 wild Eurasian griffon vulture from Spain. *Conservation Biology*. 29: 587-592.

704

705

706

707

708

709

710

711

712

713

714

715

716

717

718

719

720

721

722 Table 1: Pharmacokinetic parameters for the two vultures *Gyps coprotheres* (32745 and 32746)  
 723 treated with nimesulide at 17.58 mg/kg bw by the oral route.

724

| Parameter       | Units                  | Vulture |         | Mean    | SD     | CV (%) |
|-----------------|------------------------|---------|---------|---------|--------|--------|
|                 |                        | 32745   | 32746   |         |        |        |
| $C_{max}$       | µg/mL                  | 7.00    | 9.00    | 7.94    | 1.41   | 0.18   |
| $T_{max}$       | h                      | 6.00    | 6.00    | 6.00    | 0.00   | 0.00   |
| $AUC_{last}$    | µg/mL*h                | 128.00  | 174.00  | 149.24  | 32.53  | 0.22   |
| $AUC_{extra}$   | µg/mL*h                | 127.97  | 29.42   | 61.36   | 69.68  | 1.14   |
| $AUC_{tot}$     | µg/mL*h                | 255.97  | 203.43  | 228.19  | 37.15  | 0.16   |
| $\%AUC_{extra}$ | %                      | 49.99   | 14.46   | 26.89   | 25.12  | 0.93   |
| $\lambda$       | 1/h                    | 0.03    | 0.08    | 0.05    | 0.03   | 0.66   |
| $AUMC_{last}$   | µg/mL*(h) <sup>2</sup> | 1464.00 | 2131.00 | 1766.29 | 471.64 | 0.27   |
| $T_{half}$      | h                      | 22.02   | 8.98    | 14.06   | 9.22   | 0.66   |
| $MRT$           | h                      | 33.60   | 16.54   | 23.58   | 12.06  | 0.51   |
| $Cl$            | L/h*kg                 | 0.07    | 0.08    | 0.07    | 0.01   | 0.16   |
| $V_z$           | L/kg                   | 2.11    | 1.08    | 1.51    | 0.73   | 0.48   |
| $V_{ss}$        | L/kg                   | 2.23    | 1.38    | 1.76    | 0.60   | 0.34   |

725

726

727

728

729

730

731

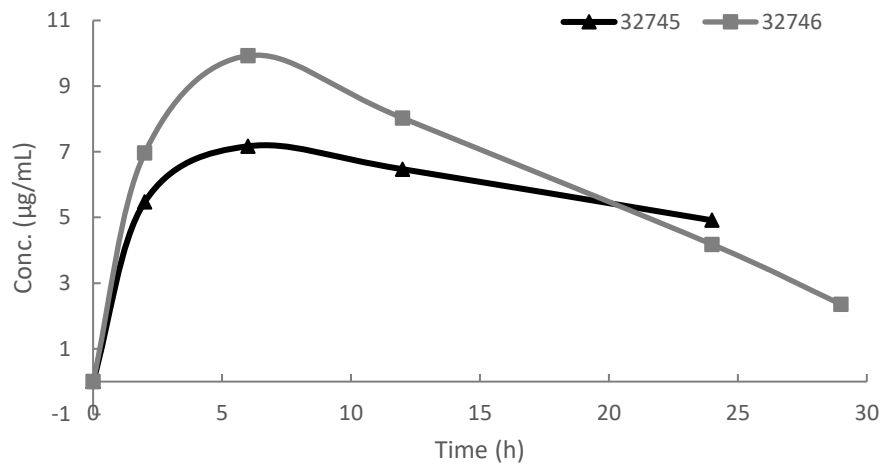

732

733 Figure 1: Pharmacokinetic profiles for the two vultures *Gyps coprotheres* (32745 and 32746)

734 treated with nimesulide at 17.58 mg/kg bw by the oral route.

735

736

737

738

739

740

741

742

743

744

745

746

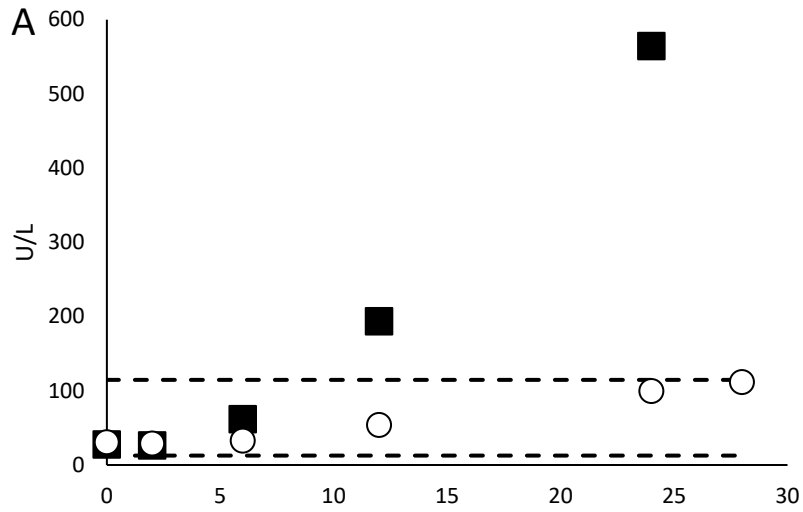

747

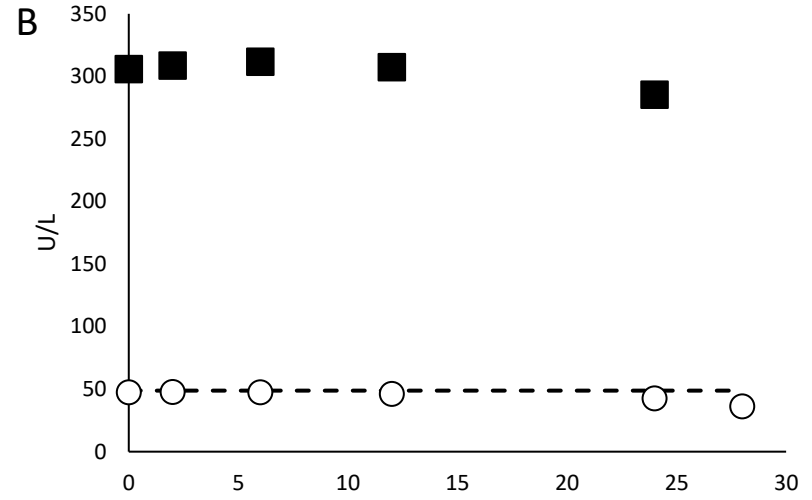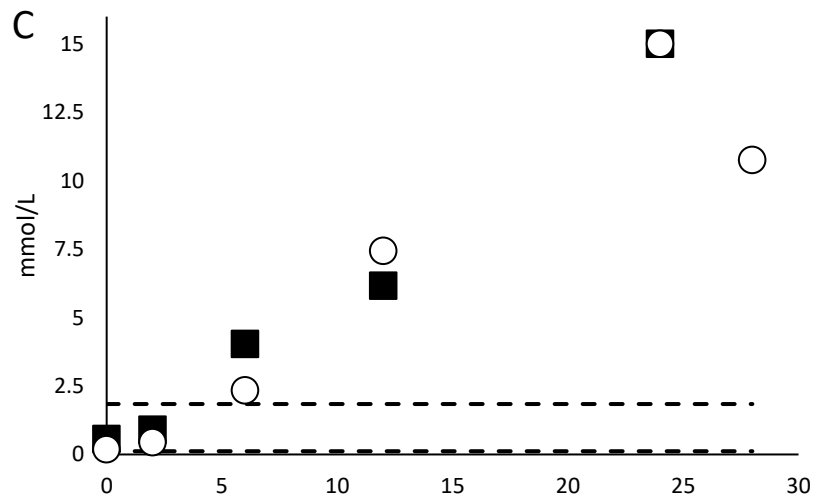

748

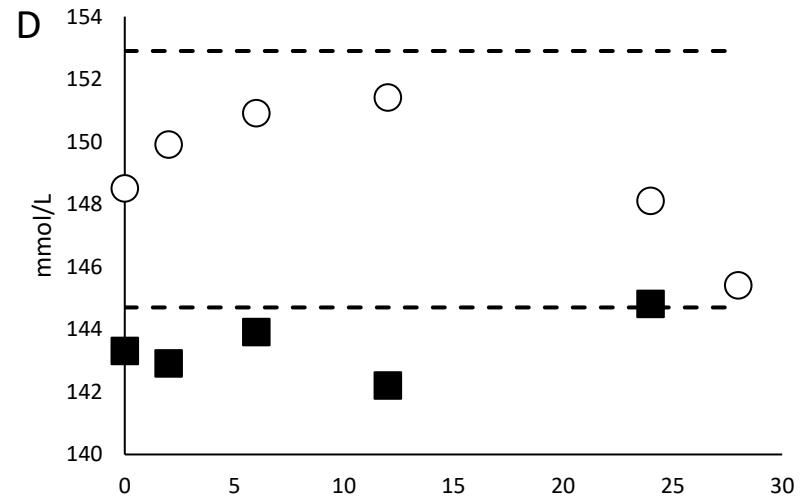



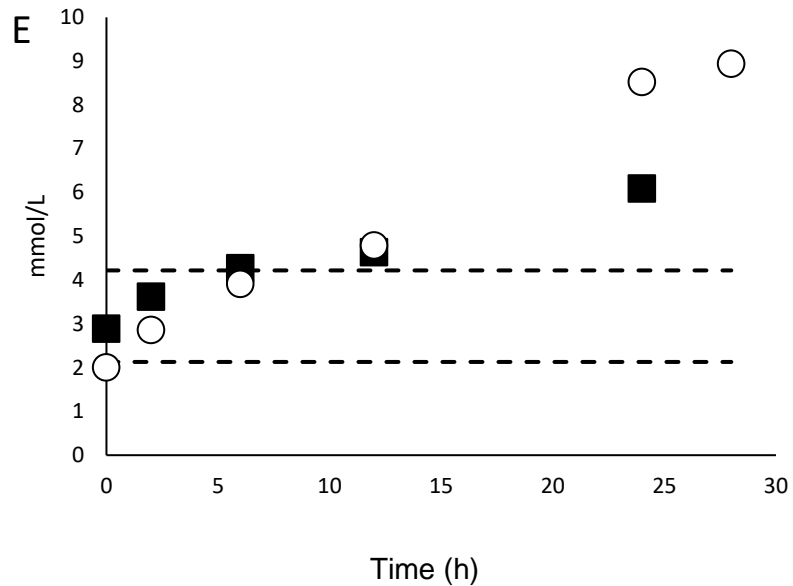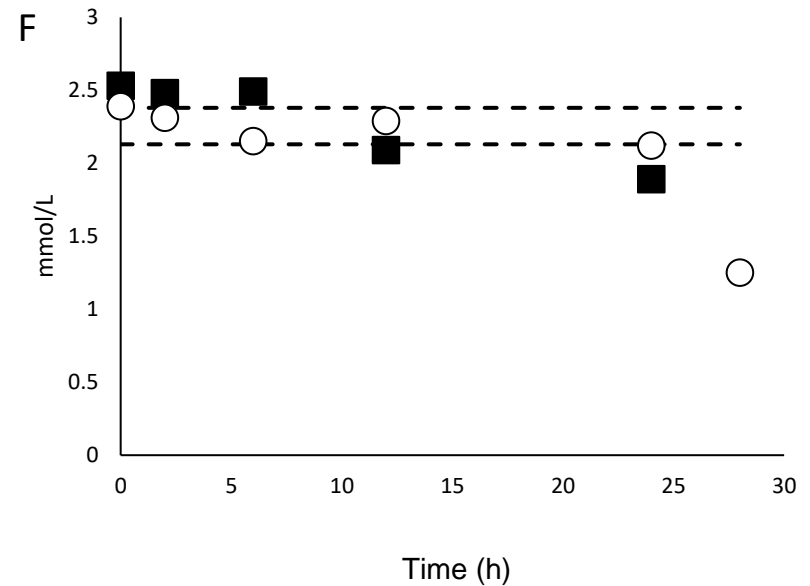

749

750

751

752 Figure 2: Change over time in plasma ALT (A), ALP (B), uric acid (C), sodium (D), potassium (E) and calcium (F) concentrations in  
 753 two vultures (solid squares = G32745 and open circles = G32746) treated with nimesulide at 17.58 mg/kg bw. G32746 likely  
 754 received a lower unknown dose as it was observed expelling liquid immediately after dosing. Dashed lines show the normal range of  
 755 concentrations for each analyte, delineated by the lowest and highest measurements taken from two control vultures.

756

757

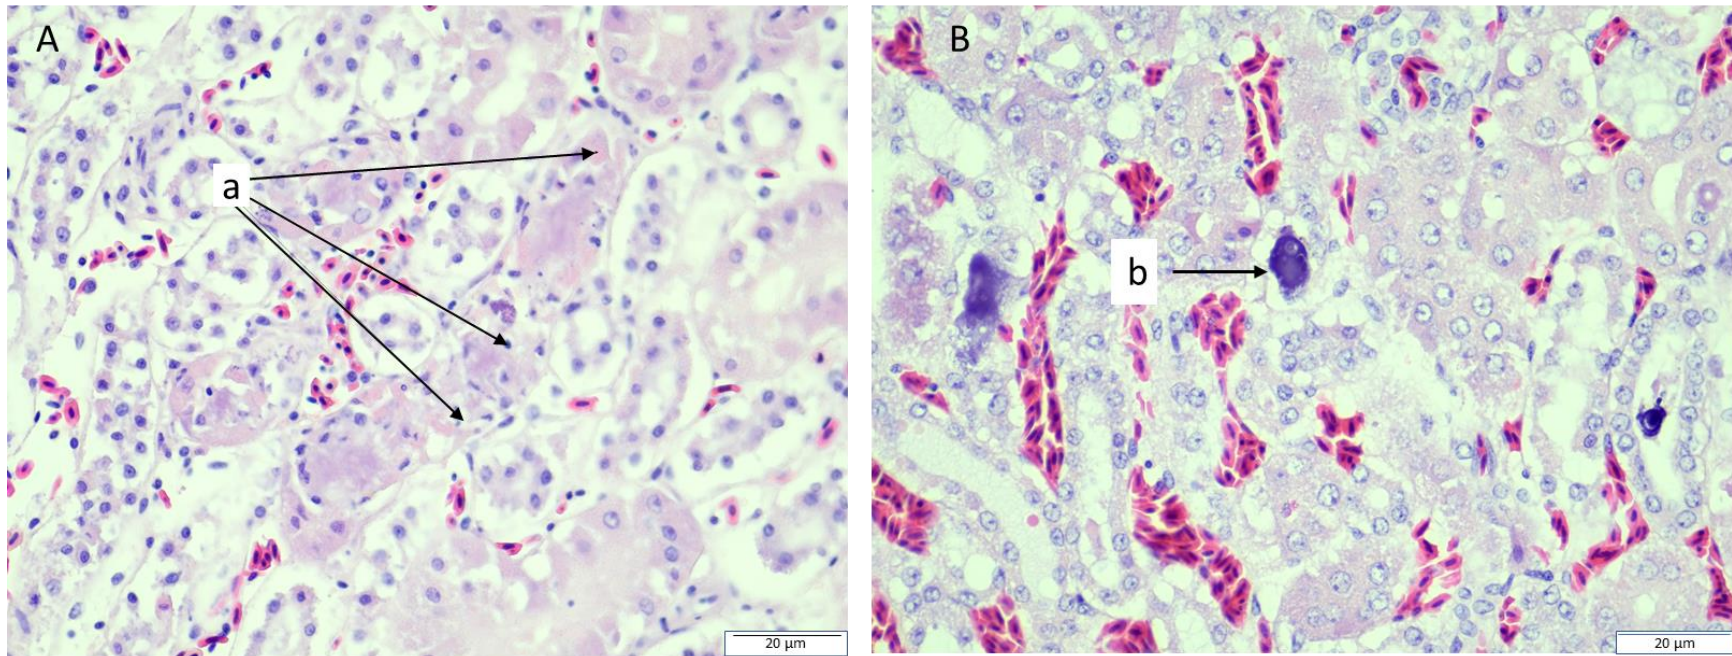

758

759

760 Figure 3: Histopathological images of kidney tissue from two Cape vultures (*Gyps coprotheres*; A = G32745 and B = G32746) treated  
 761 with nimesulide at 17.58 mg/kg bw. Image A: increased cytoplasmic eosinophilia, nuclear pyknosis and karyorrhexis and  
 762 desquamation from the basement membrane of the renal tubule cells. There are several renal tubules (a) containing dead and dying  
 763 cells, with bright pink cytoplasm, the nucleus is either small and black (pyknosis) or consists of varying sized black dots  
 764 (karyorrhexis). They are also no longer attached to the side of the tubule (desquamation), which occurs after death. Image B:  
 765 centrally, a small tophus consisting of an area of necrosis with loss of normal architecture, being replaced by cell debris and spicules  
 766 of uric acid. The purple blob (b) is a form of urate, called globular urate, which also occurs in cases of visceral gout.
